# Supplementary material for: NiFe2O4 quantum dots anchored on flower-like Ni-MOF with enhanced electrochemical performance for supercapacitors
Source: Royal Society of Chemistry journal article supplement (doi:10.1039/d3tc03096b), 2023-01-01
Supplement: d3tc03096b1.pdf [file d3tc03096b1.pdf]

# **NiFe<sub>2</sub>O<sub>4</sub> quantum dots anchored on flower-like Ni-MOF with enhanced electrochemical performance for supercapacitors**

Jiaxi Xu, Hao Guo\*, Yanrui Hao, Jiaying Tian, Yinsheng Liu, Henglong Ren, Wu Yang\*

Key Lab of Eco-Environments Related Polymer Materials of MOE, Key Lab of Bioelectrochemistry and Environmental Analysis of Gansu Province, College of Chemistry and Chemical Engineering, Northwest Normal University, Gansu International Scientific and Technological Cooperation Base of Water-Retention Chemical Functional Materials, Lanzhou

730070, P R China

---

\* Correspondence authors. Email: [xbsfda123@126.com](mailto:xbsfda123@126.com) (W. Yang) and [haoguo12@126.com](mailto:haoguo12@126.com) (H. Guo).

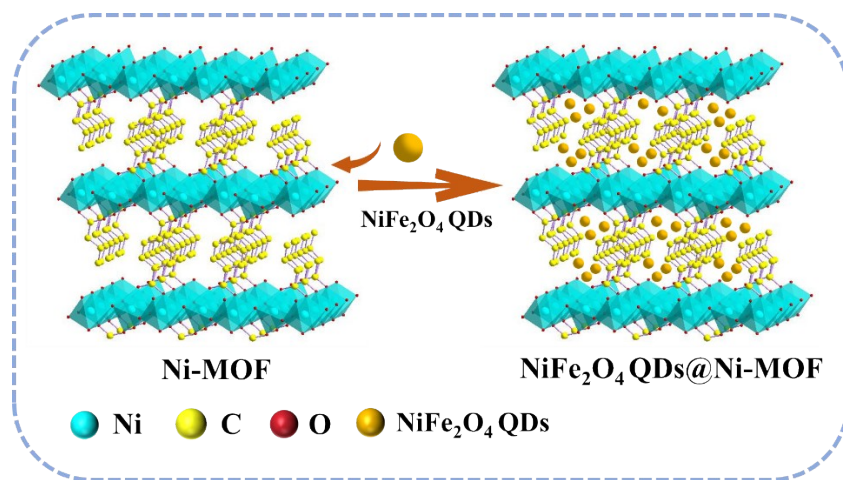

**Figure S1** View of the structure of Ni-MOF/NiFe<sub>2</sub>O<sub>4</sub>.

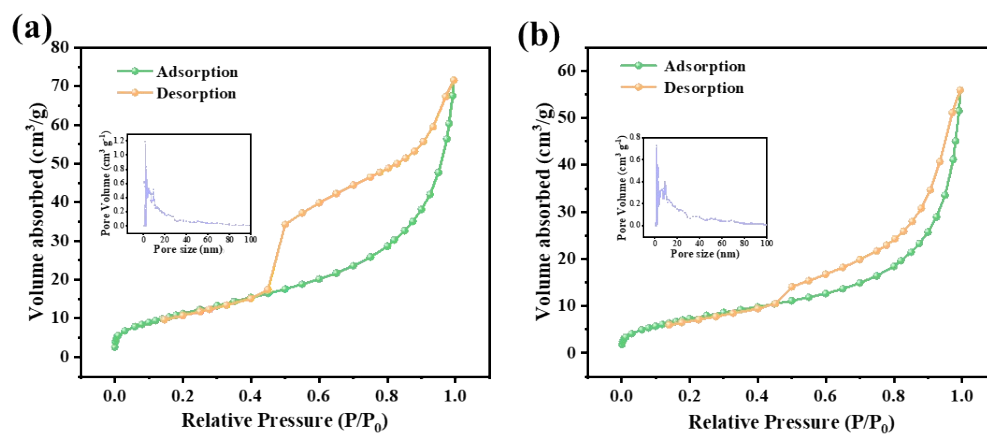

**Figure S2** N<sub>2</sub> adsorption and desorption isotherms of (a) Ni-MOF, (b) NiFe<sub>2</sub>O<sub>4</sub> QDs@Ni-MOF-10

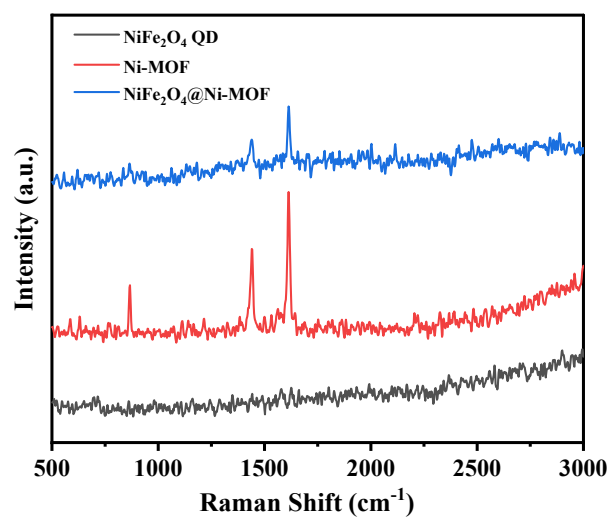

**Figure S3** Raman spectrum of NiFe<sub>2</sub>O<sub>4</sub> QDs, Ni-MOF and NiFe<sub>2</sub>O<sub>4</sub> QDs@ Ni-MOF.

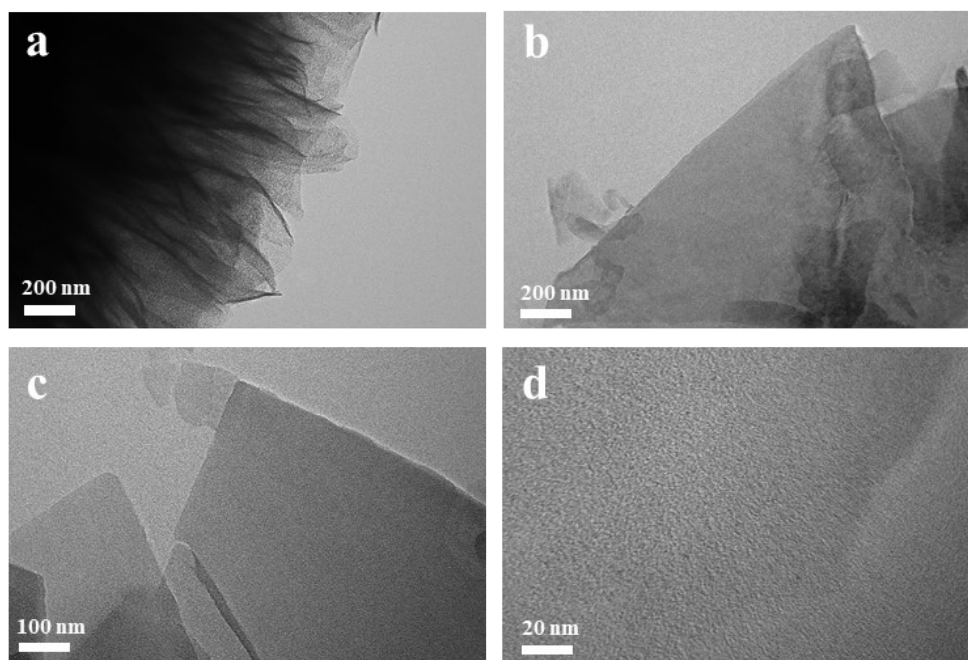

**Figure S4** TEM images of Ni-MOF at different magnifications.

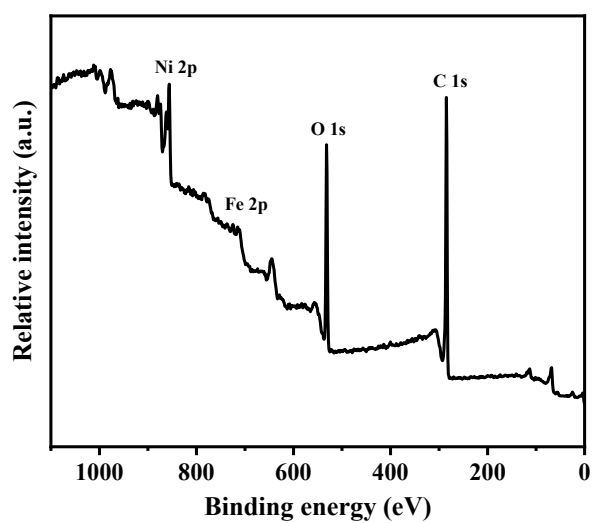

**Figure S5** XPS full spectra of NiFe<sub>2</sub>O<sub>4</sub> QDs@Ni-MOF-10

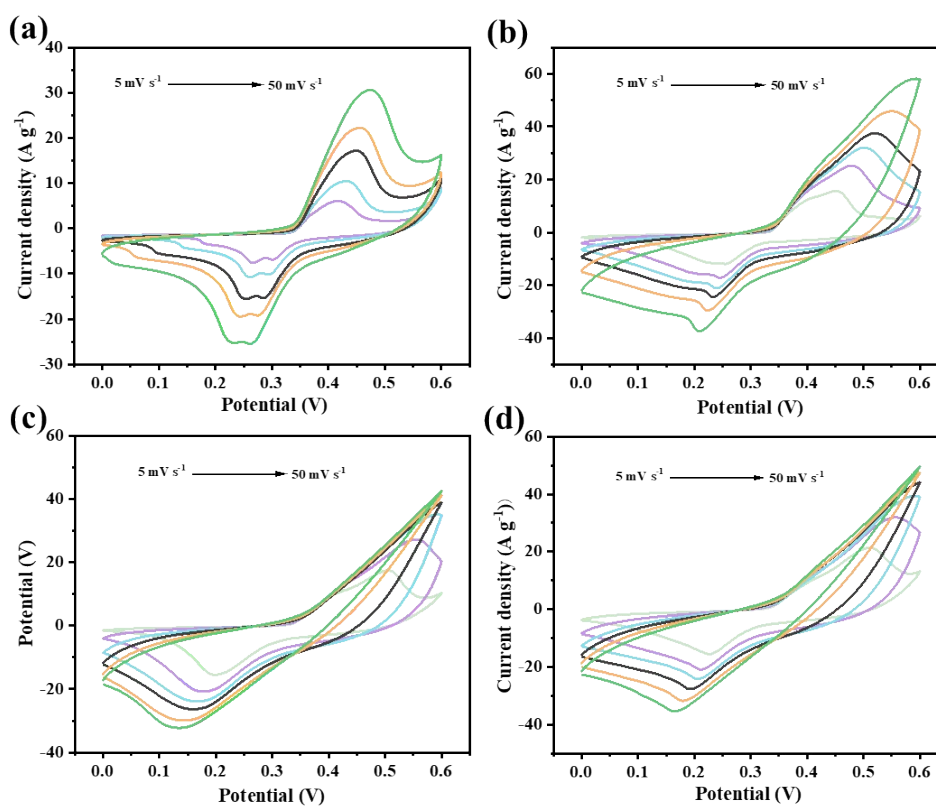

**Figure S6** CV curves measured at different scan rates of (a) NiFe<sub>2</sub>O<sub>4</sub> QDs, (b) Ni-MOF, (c) NiFe<sub>2</sub>O<sub>4</sub> QDs@Ni-MOF-5, (d) NiFe<sub>2</sub>O<sub>4</sub> QDs@Ni-MOF-15.

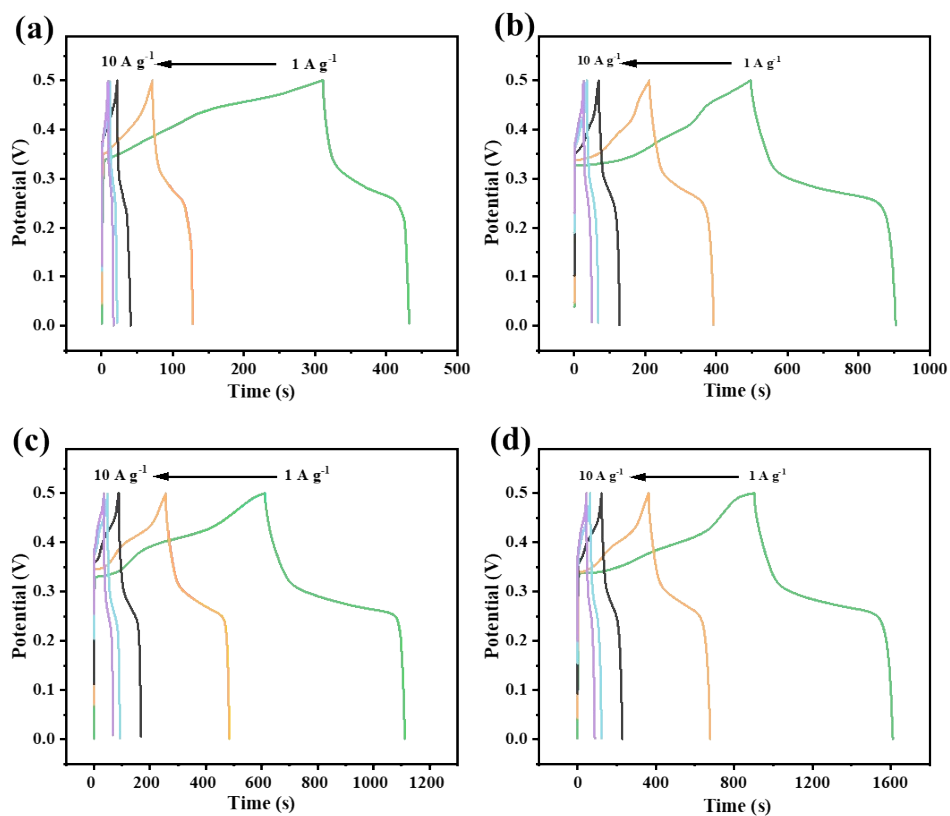

**Figure S7** GCD curves measured at current density of (a) NiFe<sub>2</sub>O<sub>4</sub> QDs, (b) Ni-MOF, (c) NiFe<sub>2</sub>O<sub>4</sub> QDs@Ni-MOF-5, (d) NiFe<sub>2</sub>O<sub>4</sub> QDs@Ni-MOF-15.

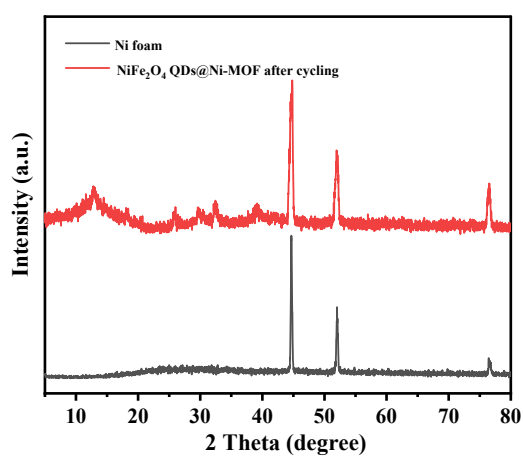

**Figure S8** XRD patterns of NiFe<sub>2</sub>O<sub>4</sub> QDs@Ni-MOF-10 after cycling.

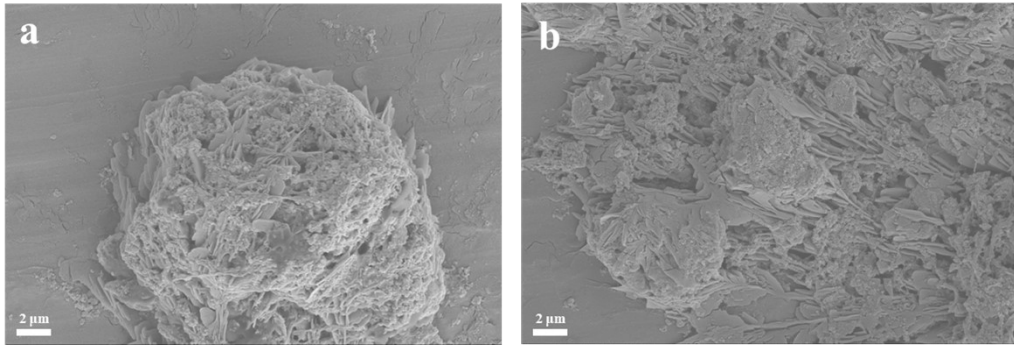

**Figure S9** SEM images of NiFe<sub>2</sub>O<sub>4</sub> QDs@Ni-MOF-10 after cycling.

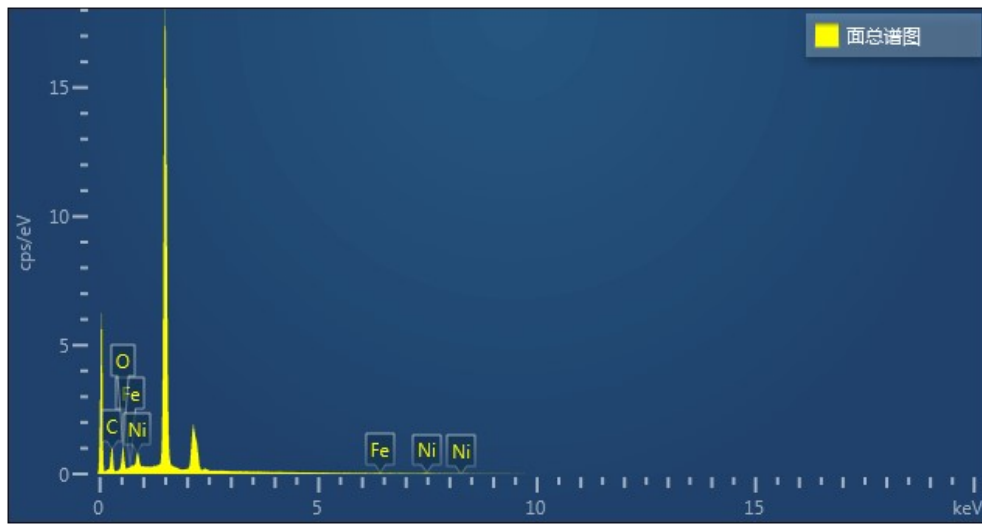

**Figure S10** Distribution of elements in NiFe<sub>2</sub>O<sub>4</sub> QDs@Ni-MOF-10

**Table S1** The elemental content in NiFe<sub>2</sub>O<sub>4</sub> QDs@Ni-MOF-10.

| Element | Obvious concentration | K ratio | wt%   | wt% (Sigma) |
|---------|-----------------------|---------|-------|-------------|
| C       | 0.29                  | 0.00290 | 37.30 | 2.85        |
| O       | 0.57                  | 0.00191 | 23.23 | 1.80        |
| Fe      | 0.12                  | 0.00119 | 8.89  | 2.07        |
| Ni      | 0.38                  | 0.00381 | 30.58 | 5.05        |

**Table S2** The ICP-MS results of NiFe<sub>2</sub>O<sub>4</sub> QDs@Ni-MOF with different QDs quantities.

| Number of sample                               | Detected element | Concentration of iron (μg/L) | Concentration of iron in digestion solution (μg/L) | Content of iron in sample (μg/kg) | Percentage of iron in sample (%) |
|------------------------------------------------|------------------|------------------------------|----------------------------------------------------|-----------------------------------|----------------------------------|
| NiFe <sub>2</sub> O <sub>4</sub> QDs@Ni-MOF-5  | Fe               | 82.087                       | 8208.70199                                         | 11033201.6                        | 1.10                             |
| NiFe <sub>2</sub> O <sub>4</sub> QDs@Ni-MOF-10 | Fe               | 129.578                      | 12957.776                                          | 19282404.8                        | 1.93                             |
| NiFe <sub>2</sub> O <sub>4</sub> QDs@Ni-MOF-15 | Fe               | 267.912                      | 26791.1595                                         | 33888933.4                        | 3.40                             |
